# Supplementary material for: A hydrogen/oxygen hybrid biofuel cell comprising an electrocatalytically active nanoflower/laccase-based biocathode
Source: Royal Society of Chemistry journal article supplement (doi:10.1039/d0cy00675k), 2020-01-01
Supplement: d0cy00675k1.pdf [file d0cy00675k1.pdf]

**A hydrogen/oxygen hybrid biofuel cell comprising an electrocatalytically active  
nanoflowers/laccase-based biocathode**

Joseph Yoon Young Lee<sup>1</sup>, Kamal Elouarzaki<sup>1,2</sup>, Harshjot Singh Sabharwal<sup>2</sup>, Adrian C. Fisher<sup>2,3</sup>, and Jong-  
Min Lee<sup>1,2\*</sup>

<sup>1</sup> School of Chemical and Biomedical Engineering, Nanyang Technological University, 62 Nanyang Drive,  
Singapore 637459, Singapore

<sup>2</sup> Cambridge CARES, CREATE Tower, 1 CREATE Way, Singapore 138602, Singapore

<sup>3</sup> Department of Chemical Engineering and Biotechnology, University of Cambridge, West Cambridge Site,  
Philippa Fawcett Drive, Cambridge CB3 0AS, United Kingdom

## **Characterizations**

FE-SEM samples were prepared by depositing 2  $\mu\text{l}$  of each laccase-metal hybrid suspension onto the silicon wafer, followed by sputter-coating with platinum. For TEM analysis, a suspension droplet was deposited onto the copper grid and dried at room temperature. TEM images were taken with JEOL JEM 2100F transmission electron microscope at 200 kV. For X-ray diffraction (XRD) analysis, 50 mg of laccase was dissolved in 100 ml of 0.01 M PBS (pH 7.4) prior to the addition of 0.667 ml of copper sulfate pentahydrate ( $\text{CuSO}_4 \cdot 5\text{H}_2\text{O}$ ), manganese acetate tetrahydrate ( $\text{Mn}(\text{CH}_3\text{COO})_2 \cdot 4\text{H}_2\text{O}$ ), and zinc nitrate hexahydrate ( $\text{Zn}(\text{NO}_3)_2 \cdot 6\text{H}_2\text{O}$ ) aqueous solutions. Each precipitate was collected onto the membrane filter (0.2  $\mu\text{m}$ ), followed by washing with deionized water and drying in the oven at 70  $^\circ\text{C}$ . Crystalline structures of dried powder samples were analyzed with Bruker D2 Phaser XRD instrument with Cu-K $\alpha$  radiation ( $\lambda = 0.15405 \text{ nm}$ ). Elemental composition of hybrid suspension samples was analyzed with X-ray photoelectron spectroscopy (XPS) with a Thermo Scientific ESCALAB-250Xi spectrometer with monochromatic Al-K $\alpha$  radiation.

## **Synthesis of laccase-metal hybrid suspensions**

All laccase-metal hybrid suspensions were prepared as described by Zare and coworkers [1]. 20  $\mu\text{l}$  of metal aqueous solution was added to 3 ml of 0.01 M phosphate buffered saline (PBS) containing different amount of laccase (0.5  $\text{mg ml}^{-1}$ , 1.0  $\text{mg ml}^{-1}$ , and 2.5  $\text{mg ml}^{-1}$ ) and incubated at room temperature for 3 days. After 3 days, light blue precipitates were formed for all laccase-

Cu samples whereas white-colored suspensions were observed for laccase-Mn and laccase-Zn hybrid suspensions.

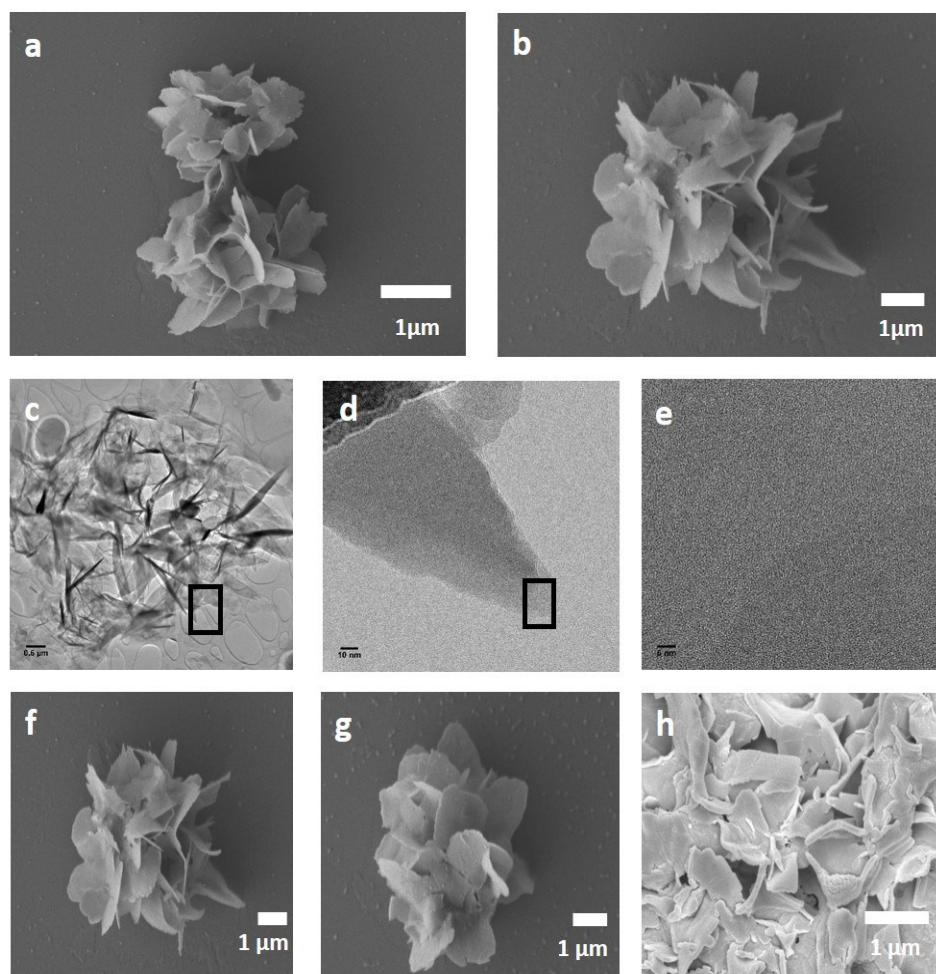

**Fig. S1. Laccase-Mn hybrid suspensions.** **a**, FE-SEM image of 2.5 mg ml<sup>-1</sup> laccase-Mn hybrid suspensions. **b**, FE-SEM image of suspensions. **c-e**, TEM images of laccase-Mn hybrid nanoflowers. **f-h**, Laccase-Mn suspensions in different concentrations of laccase. 0.5 mg ml<sup>-1</sup> (**f**), 1.0 mg ml<sup>-1</sup> (**g**), 2.5 mg ml<sup>-1</sup> (**h**).

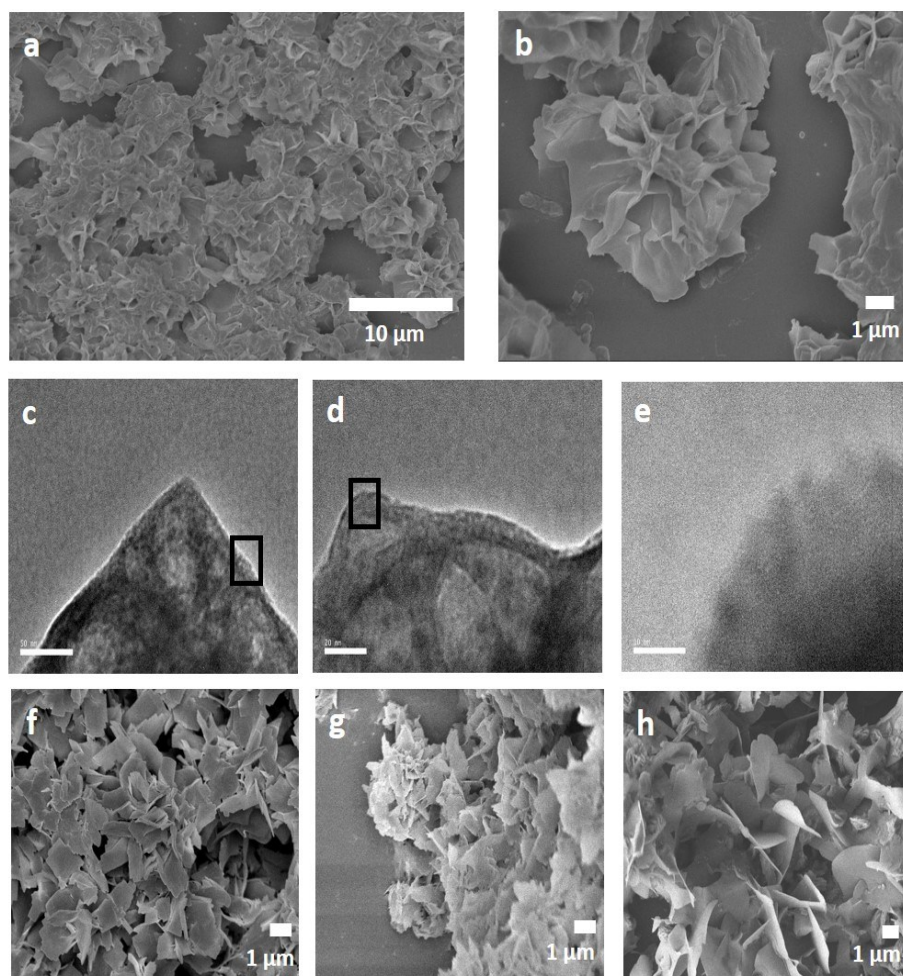

**Fig. S2. Laccase-Zn hybrid suspensions.** **a**, FE-SEM image of 2.5 mg ml<sup>-1</sup> laccase-Zn hybrid suspensions. **b**, FE-SEM image of suspensions. **c-e**, TEM images of laccase-Zn hybrid nanosuspensions. **f-h**, Laccase-Zn suspensions in different concentrations of laccase. 0.5 mg ml<sup>-1</sup> (**f**), 1.0 mg ml<sup>-1</sup> (**g**), 2.5 mg ml<sup>-1</sup> (**h**).

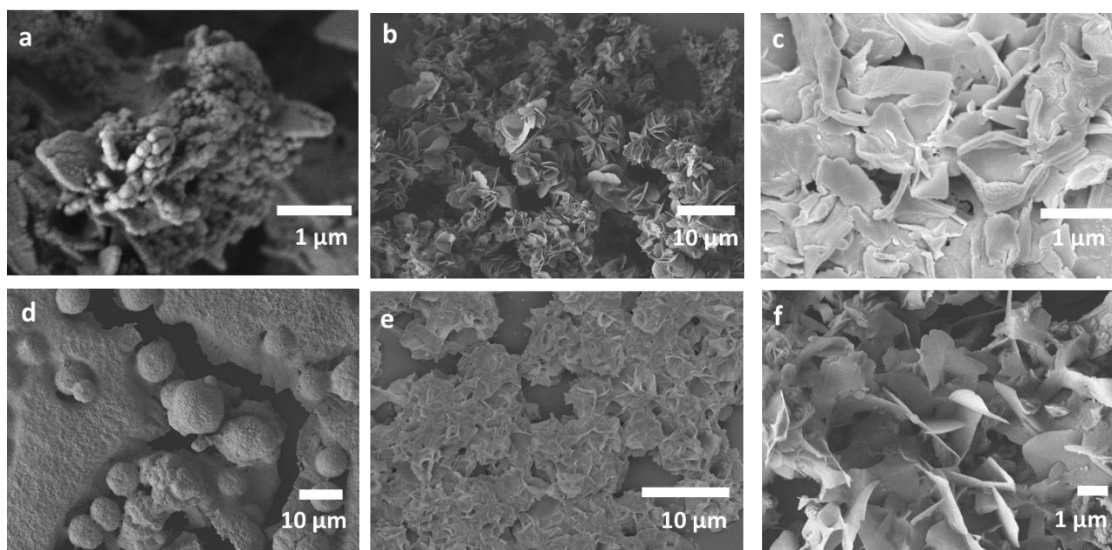

**Fig. S3.** Morphology of  $2.5 \text{ mg ml}^{-1}$  laccase-Mn and laccase-Zn hybrid suspensions as a function of time. **a-c**,  $2.5 \text{ mg ml}^{-1}$  laccase-Mn hybrid suspensions at 1 h (**a**), 5 h (**b**), and 76 h (**c**). **d-f**,  $2.5 \text{ mg ml}^{-1}$  laccase-Zn hybrid suspensions at 1 h (**d**), 5 h (**e**), and 76 h (**f**).

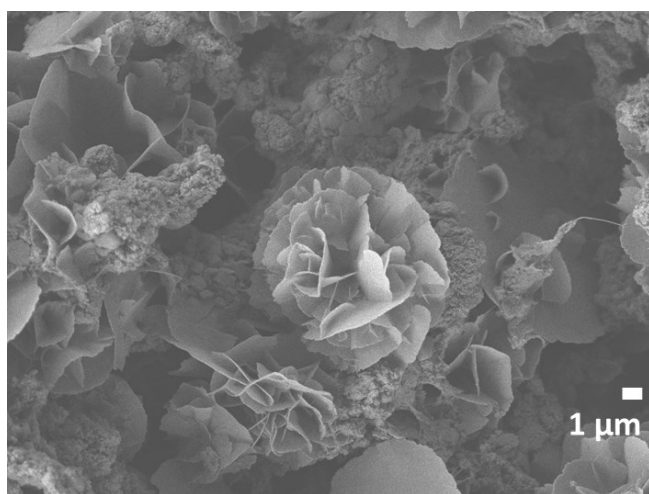

**Fig. S4.** FE-SEM image of laccase-Cu hybrid suspensions combined with carbon nanotubes (CNTs).

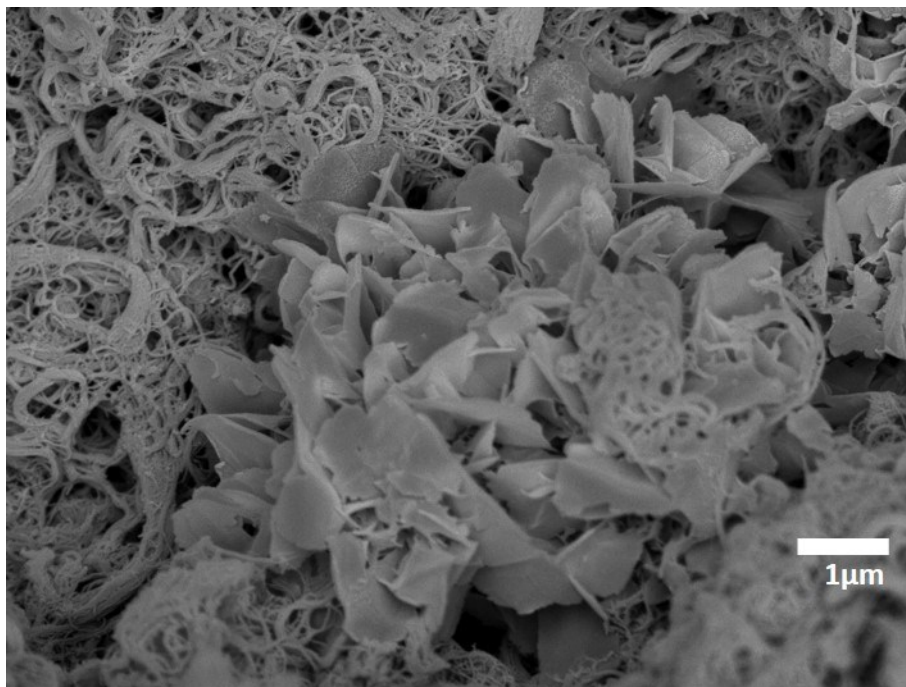

**Fig. S5.** FE-SEM image of laccase-Mn hybrid suspensions combined with carbon nanotubes (CNTs).

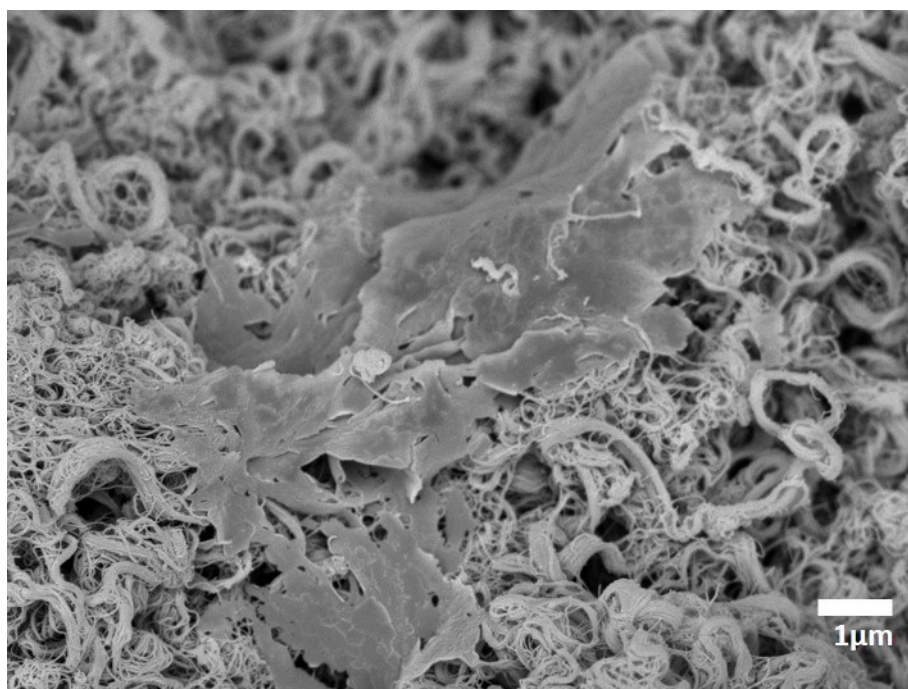

**Fig. S6.** FE-SEM image of laccase-Zn hybrid suspensions combined with carbon nanotubes (CNTs).

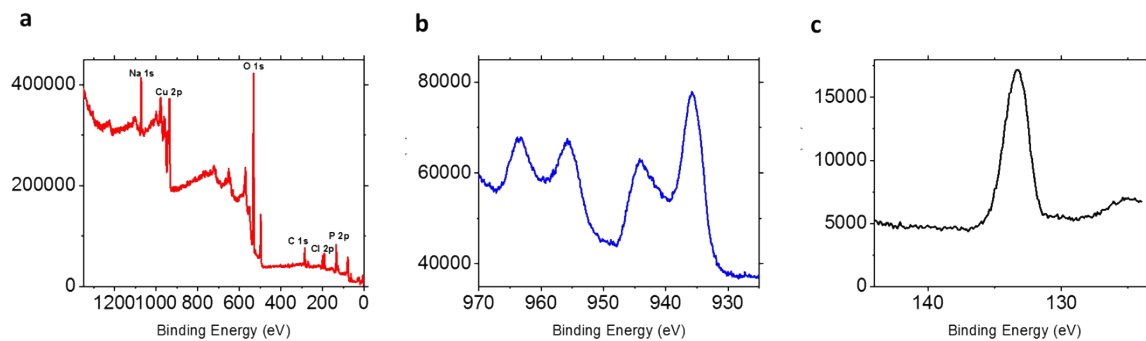

**Fig. S7.** XPS spectrum of Laccase-Cu nanoflowers with survey scan (a), Cu 2p (b), and P 2p peaks (c).

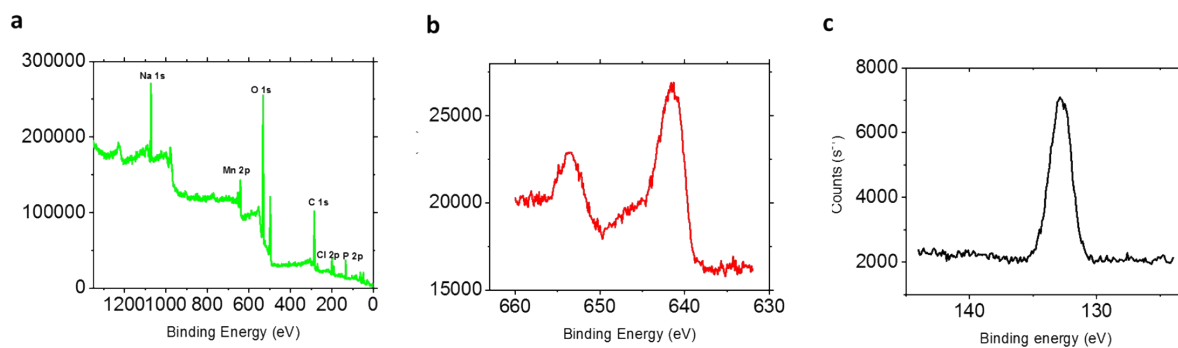

**Fig. S8.** XPS spectrum of Laccase-Mn suspensions with survey scan (a), Mn 2p (b), and P 2p peaks (c).

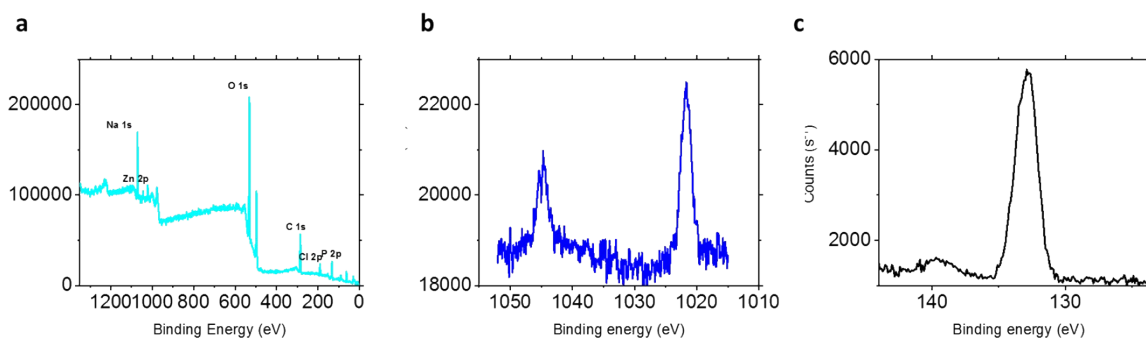

**Fig. S9.** XPS spectrum of Laccase-Zn suspensions with survey scan (a), Zn 2p (b), and P 2p peaks (c).



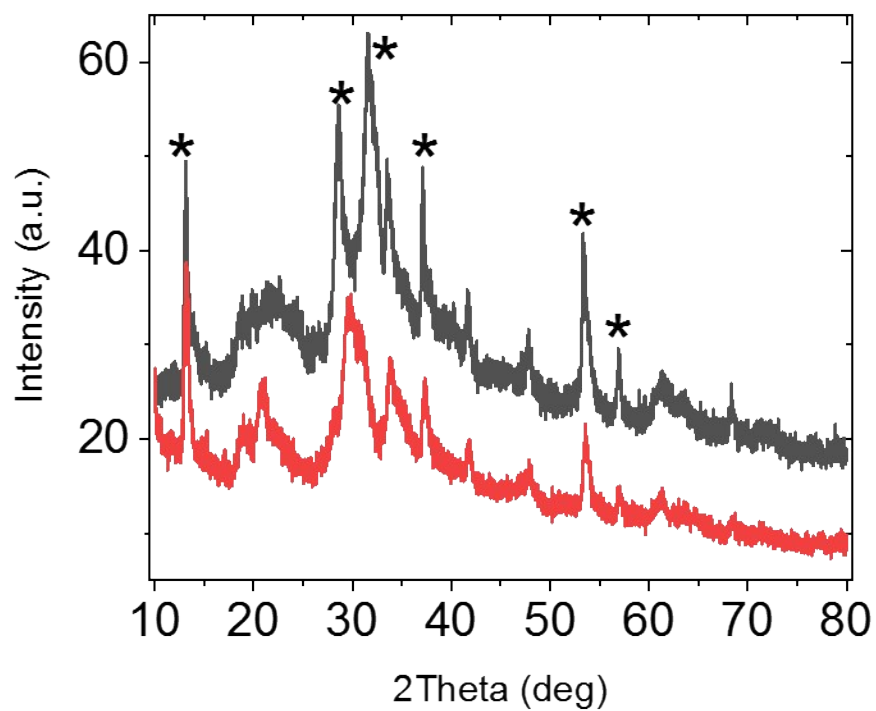

**Fig. S10.** XRD spectra of 2.5 mg ml<sup>-1</sup> Laccase-Cu nanoflowers (black) and PBS-Cu mixture (red). Asterisk corresponds to the Cu<sub>3</sub>(PO<sub>4</sub>)<sub>2</sub> peaks.

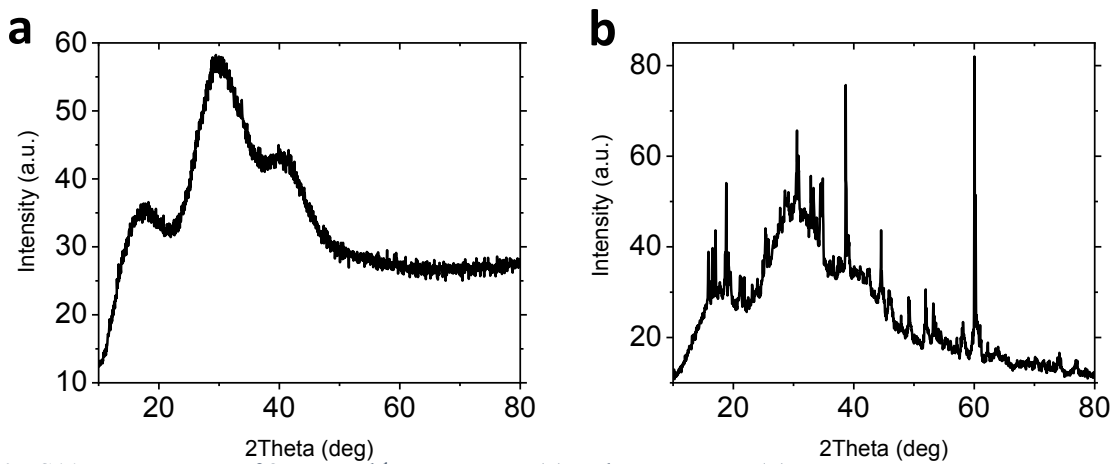

**Fig. S11.** XRD spectra of 2.5 mg ml<sup>-1</sup> Laccase-Mn (a) and Laccase-Mn (b).

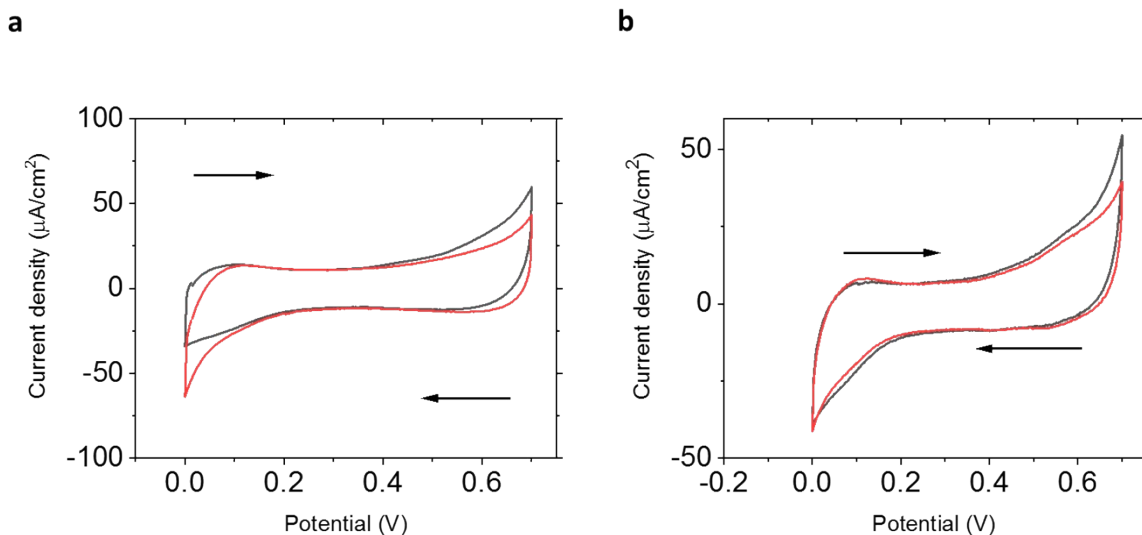

**Fig. S12.** Cyclic voltammetry measurement of MWCNT/2.5 mg ml<sup>-1</sup> Laccase-Mn (scan rate: 2 mV s<sup>-1</sup>) modified GC in Ar (black) and O<sub>2</sub> (red) atmosphere (a), and MWCNT/1.0 mg ml<sup>-1</sup> Laccase-Zn (scan rate: 5 mV s<sup>-1</sup>) in Ar (black) and O<sub>2</sub> (red) atmosphere (b).

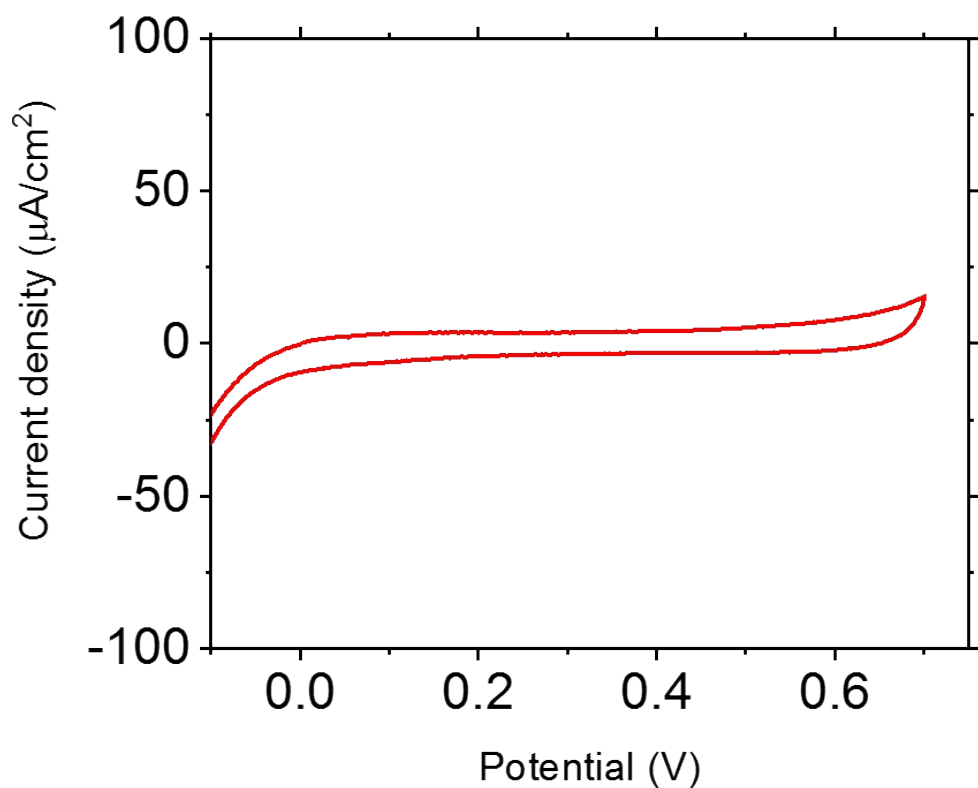

**Fig. S13.** Cyclic voltammetry (CV) of MWCNT/2.5 mg ml<sup>-1</sup> free laccase modified GC electrode in O<sub>2</sub> environment (scan rate: 5 mV s<sup>-1</sup>).

## References

- [1] J. Ge, J. Lei, R. N. Zare, Protein-inorganic hybrid nanoflowers, *Nat. Nanotechnol.*, 2012, **7**, 428-432
